# Supplementary material
Source: publisher figshare collection journal article supplement (https://frontiersin.figshare.com/ndownloader/files/33157979)
Supplement: Supplementary file [file 33157979]

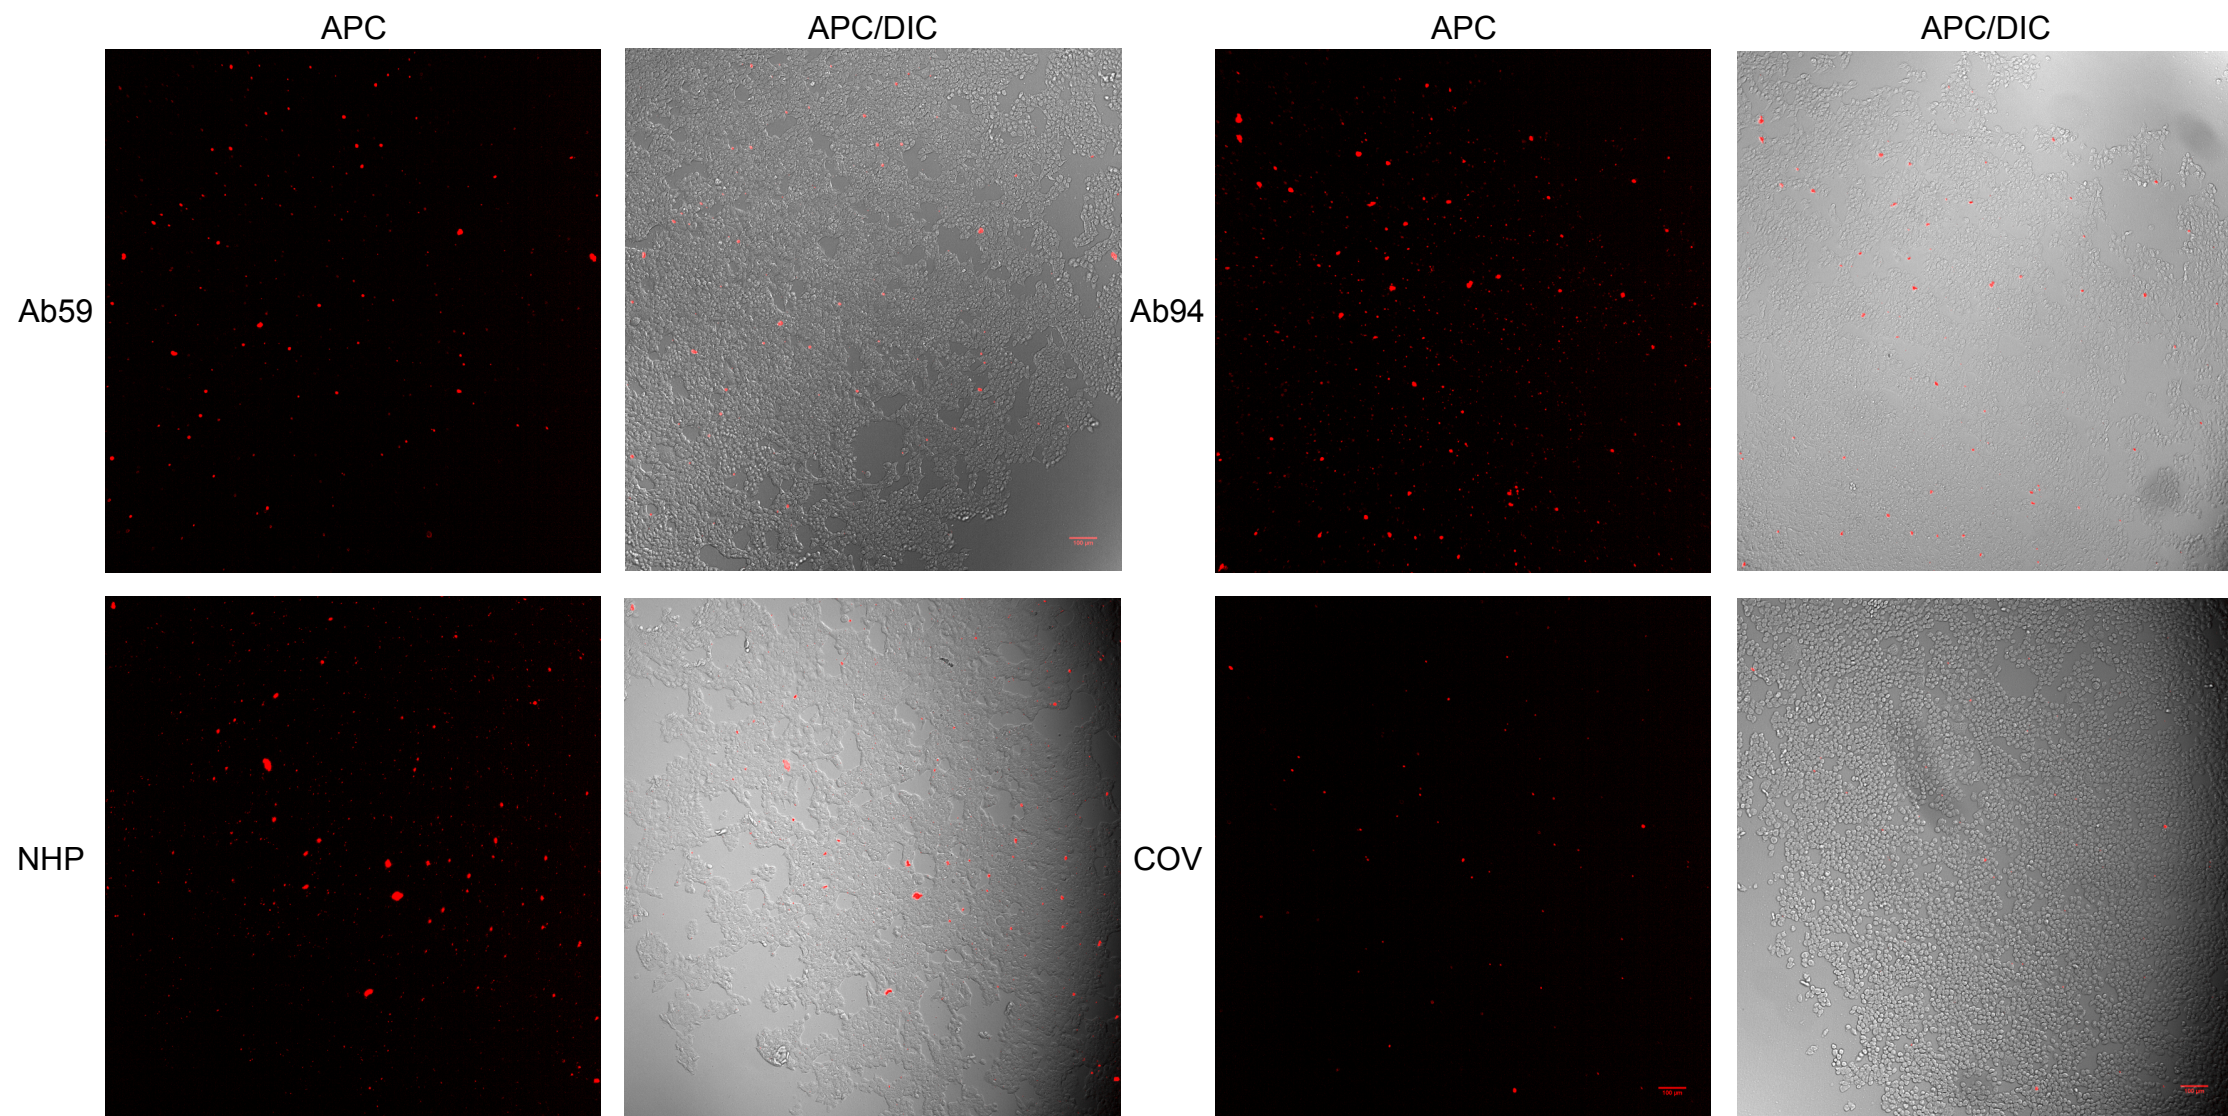

**Supplementary Figure 4. Images from Spike-bead to ACE2+cells binding neutralization experiments.**

Representative images of the data collected and used to generate the bead-based neutralization results. Fluorescence (APC) images show beads and merged APC/DIC(10x) images for Ab59, 94, and control samples (normal human plasma and COVID19 patient plasma9. The scale bar represents a 100 μm distance.
